# Supplementary material
Source: PubMed Central journal article supplement (PMC4560955)
Supplement: NIHMS691828-supplement-supplement_1.pdf [file NIHMS691828-supplement-supplement_1.pdf]

Supplemental Table 1

|                                                       | 2004 Cycles                |                            | 2011 Cycles                |                            | Combined<br>2004 and 2011 |               |
|-------------------------------------------------------|----------------------------|----------------------------|----------------------------|----------------------------|---------------------------|---------------|
| POR Cycles; N                                         | 13,088                     | 8,299                      | 13,508                     | 7,549                      | 26,596                    | 15,848        |
| Cancelled for Poor Response; N<br>(% of POR)          | 8,526 <sup>a</sup><br>(65) | 5,612 <sup>a</sup><br>(68) | 7,452 <sup>a</sup><br>(55) | 4,372 <sup>a</sup><br>(58) | 15,978<br>(60)            | 9,984<br>(63) |
| Fewer than 4 Oocytes at<br>Retrieval; N<br>(% of POR) | 4,562 <sup>a</sup><br>(35) | 2,687 <sup>a</sup><br>(32) | 6,056 <sup>a</sup><br>(45) | 3,177 <sup>a</sup><br>(42) | 10,618<br>(40)            | 5,864<br>(37) |
| Live Birth; N<br>(% of all POR)                       | 428<br>(3) <sup>a</sup>    | 354<br>(4) <sup>a</sup>    | 613<br>(4) <sup>a</sup>    | 456<br>(6) <sup>a</sup>    | 1,041<br>(4)              | 810<br>(5)    |
| (% of POR by low oocyte yield)                        | (9)                        | (13)                       | (10)                       | (14)                       | (10)                      | (14)          |

2004 vs. 2011: <sup>a</sup>  $p < 0.0001$

Supplemental Table 2

| DOR                       |                  | Unadjusted        |        |      | p-value | Adjusted <sup>a</sup> |        |      |         |
|---------------------------|------------------|-------------------|--------|------|---------|-----------------------|--------|------|---------|
|                           |                  | RR                | 95% CI |      |         | RR                    | 95% CI |      | p-value |
| Age                       | 40+ vs.<40       | 3.58              | 3.52   | 3.64 | <.0001  | 2.76                  | 2.71   | 2.82 | <.0001  |
| Prior Fresh Cycles        | 0                | 0.61              | 0.59   | 0.62 | <.0001  | 0.86                  | 0.84   | 0.88 | <.0001  |
|                           | 1                | 0.76              | 0.75   | 0.78 | <.0001  | 0.94                  | 0.92   | 0.96 | <.0001  |
|                           | 2+               | Reference         |        |      |         |                       |        |      |         |
| Prior Gonadotropin Cycles | 0                | 0.92              | 0.90   | 0.95 | <.0001  | 1.00                  | 0.97   | 1.02 | 0.7198  |
|                           | 1                | 1.09              | 1.05   | 1.14 | <.0001  | 1.05                  | 1.01   | 1.09 | 0.0102  |
|                           | 2                | 1.02              | 0.98   | 1.06 | 0.2502  | 1.00                  | 0.97   | 1.04 | 0.8594  |
|                           | 3+               | Reference         |        |      |         |                       |        |      |         |
| Gravidity                 | 0                | 0.79              | 0.78   | 0.81 | <.0001  | 1.05                  | 1.03   | 1.07 | <.0001  |
|                           | 1                | 0.91              | 0.89   | 0.93 | <.0001  | 1.03                  | 1.01   | 1.05 | 0.0094  |
|                           | 2+               | Reference         |        |      |         |                       |        |      |         |
| Basal FSH                 | >12 vs.<12mIU/mL | 3.15 <sup>a</sup> | 3.09   | 3.20 | <.0001  | 1.97                  | 1.94   | 2.01 | <.0001  |

<sup>a</sup>Cycles with basal FSH not entered or entered as 0 or >50mIU/mL excluded from analysis

Supplemental Table 3

| POR                       |            | Unadjusted |        |      | p-value | Adjusted <sup>a</sup> |        |      | p-value |
|---------------------------|------------|------------|--------|------|---------|-----------------------|--------|------|---------|
|                           |            | RR         | 95% CI |      |         | RR                    | 95% CI |      |         |
| Age                       | 40+ vs.<40 | 2.37       | 2.32   | 2.42 | <.0001  | 1.60                  | 1.55   | 1.64 | <.0001  |
| Prior Fresh Cycles        | 0          | 0.80       | 0.78   | 0.83 | <.0001  | 1.02                  | 0.99   | 1.05 | 0.1800  |
|                           | 1          | 0.86       | 0.83   | 0.88 | <.0001  | 0.99                  | 0.95   | 1.02 | 0.4472  |
|                           | 2+         | Reference  |        |      |         |                       |        |      |         |
| Prior Gonadotropin Cycles | 0          | 1.00       | 0.97   | 1.04 | 0.9221  | 1.07                  | 1.03   | 1.10 | 0.0005  |
|                           | 1          | 1.06       | 1.01   | 1.11 | 0.0306  | 1.05                  | 0.99   | 1.10 | 0.1046  |
|                           | 2          | 0.98       | 0.93   | 1.03 | 0.4141  | 0.98                  | 0.92   | 1.03 | 0.3978  |
|                           | 3+         | Reference  |        |      |         |                       |        |      |         |
| Gravidity                 | 0          | 0.88       | 0.86   | 0.90 | <.0001  | 1.03                  | 1.00   | 1.06 | 0.0976  |
|                           | 1          | 0.93       | 0.90   | 0.96 | <.0001  | 1.01                  | 0.98   | 1.04 | 0.5320  |
|                           | 2+         | Reference  |        |      |         |                       |        |      |         |
| Basal FSH                 | >12 vs.<12 | 2.91       | 2.84   | 2.99 | <.0001  | 1.96                  | 1.91   | 2.02 | <.0001  |
| DOR                       | Yes vs. No | 2.88       | 2.82   | 2.94 | <.0001  | 1.94                  | 1.88   | 2.00 | <.0001  |

<sup>a</sup>Cycles with basal FSH not entered or entered as 0 or >50mIU/mL excluded from analysis
